# Supplementary material
Source: PubMed Central journal article supplement (PMC6825518)

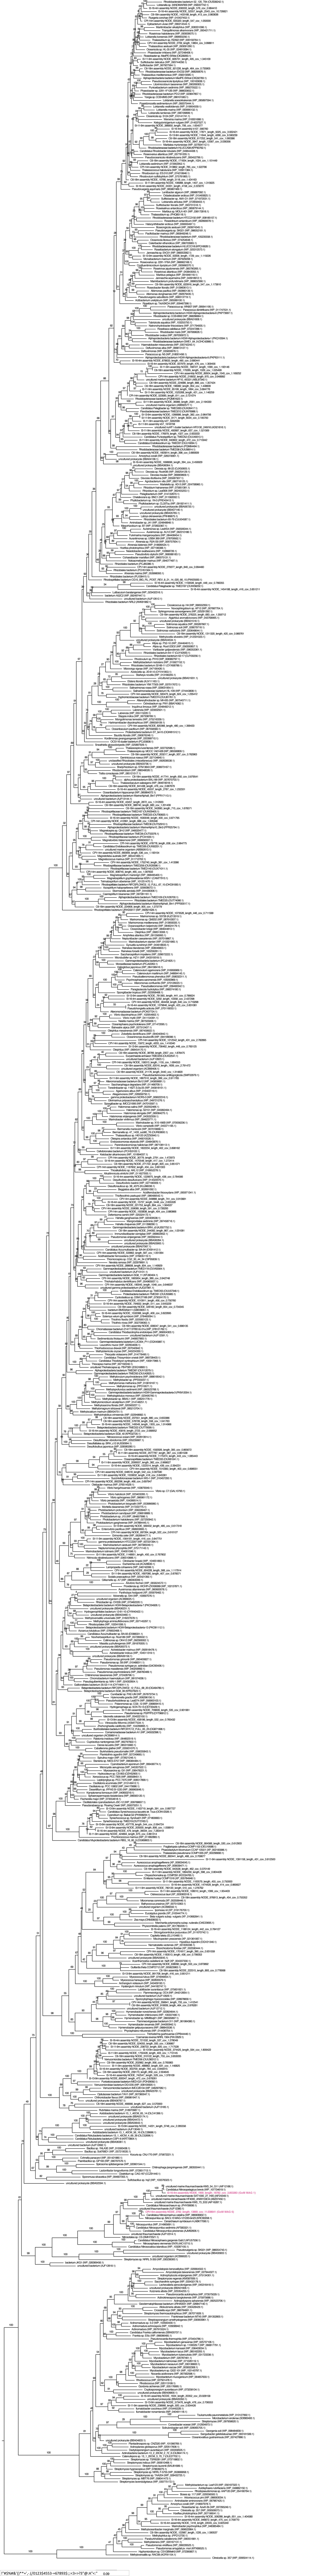

Supplement: EMS84688-supplement-Supplementary_File_1.pdf [file EMS84688-supplement-Supplementary_File_1.pdf]
